# Supplementary material for: An electronic synapse memristor device with conductance linearity using quantized conduction for neuroinspired computing
Source: Royal Society of Chemistry journal article supplement (doi:10.1039/c8tc04395g), 2018-12-01
Supplement: c8tc04395g1.pdf [file c8tc04395g1.pdf]

## Electronic Synapse Device with Linearizing Conductance Using Quantized Conduction for Neuroinspired Computing

Jianhui Zhao<sup>1</sup>, Zhenyu Zhou<sup>1</sup>, Yuanyuan Zhang<sup>1</sup>, Jingjuan Wang<sup>1</sup>, Lei Zhang<sup>1</sup>, Xiaoyan Li<sup>1</sup>, Mengliu Zhao<sup>1</sup>, Hong Wang<sup>1</sup>, Yifei Pei<sup>1</sup>, Qianlong Zhao<sup>1</sup>, Zuoao Xiao<sup>1</sup>, Kaiyang Wang<sup>1</sup>, Cuiya Qin<sup>1</sup>, Gong Wang<sup>1</sup>, Hui Li<sup>1</sup>, Bangfu Ding<sup>1</sup>, Faguang Yan,<sup>3</sup> Kaiyou Wang,<sup>3</sup> Deliang Ren<sup>1\*</sup>, Baoting Liu<sup>1\*</sup>, Xiaobing Yan<sup>1,2\*</sup>

<sup>1</sup> National-Local Joint Engineering Laboratory of New Energy Photovoltaic Devices, Key Laboratory of Optoelectronic Information Materials of Hebei Province, Key Laboratory of Digital Medical Engineering of Hebei Province, College of Electron and Information Engineering, Hebei University, Baoding 071002, P. R. China

<sup>2</sup> Institute of Semiconductors, Chinese Academy of Science, Beijing 100083, China

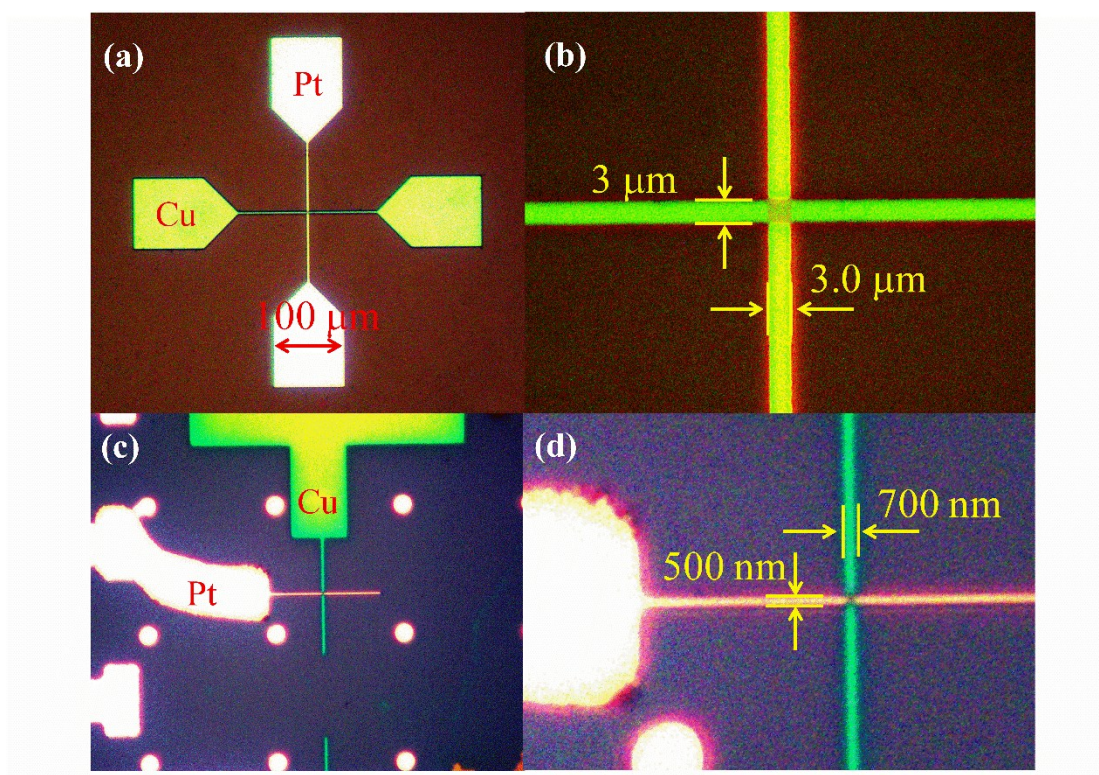

**Figure S1.** The photo of smaller device. a, b)  $3\mu\text{m} \times 3\mu\text{m}$  devices by lithographic process and c, d)  $500\text{nm} \times 700\text{nm}$  devices by electron beam lithography.

\*Corresponding author: xiaobing\_yan@126.com, rendeliang12@126.com, baoting\_liu@hotmail.com.

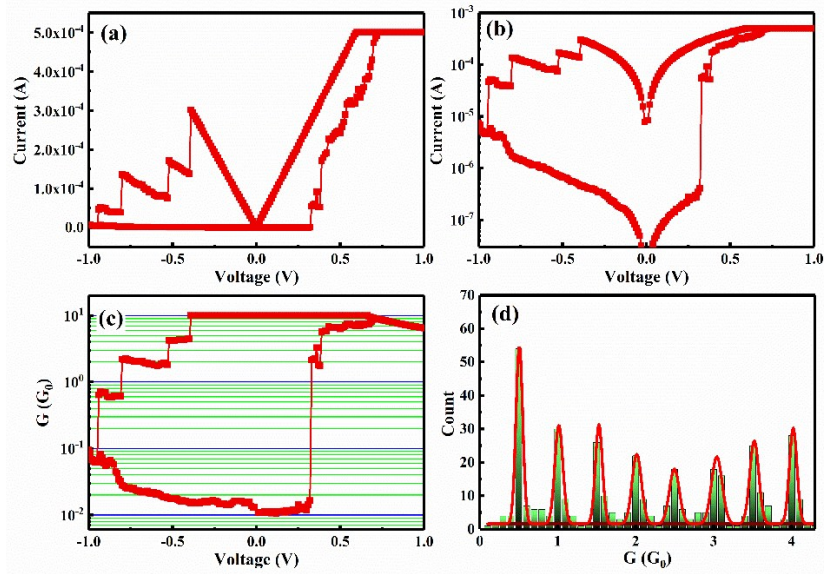

**Figure S2.** a) Typical DC I-V characteristics of Cu/Zr<sub>0.5</sub>Hf<sub>0.5</sub>O<sub>2</sub>/Pt of 3 μm × 3 μm. b) I-V curve in the logarithmic scale. c) R-V curve in the logarithmic scale. d) Conductance-state changes histogram during 100 cycles, where peak positions were evident at integer and half-integer multiples of G<sub>0</sub>. Red line corresponded to Gaussian fitting curve of the histogram.

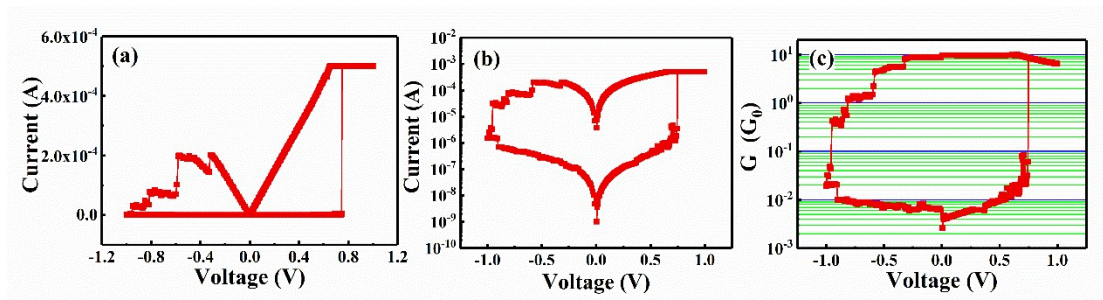

**Figure S3.** a) Typical DC I-V characteristics of Cu/Zr<sub>0.5</sub>Hf<sub>0.5</sub>O<sub>2</sub>/Pt of 500 nm × 700 nm. b) I-V curve in the logarithmic scale. c) R-V curve in the logarithmic scale.

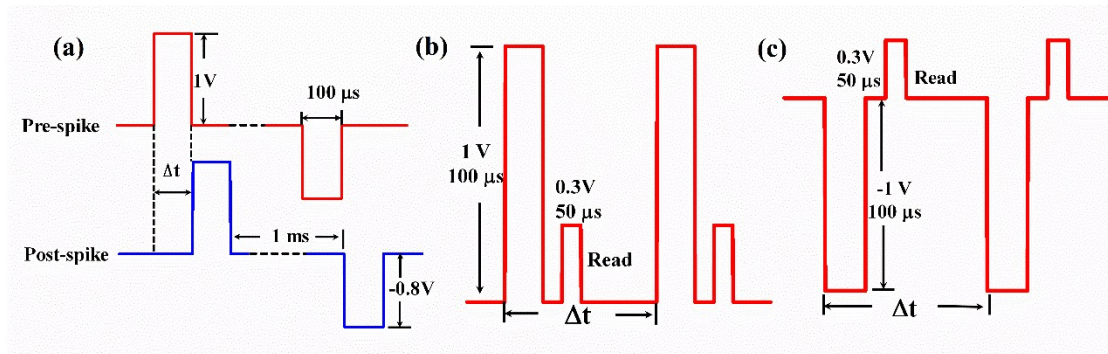

**Figure S4.** Pre- and postsynaptic spikes utilized to implement STDP and (PPF). (a) Spikes for asymmetric Hebbian learning rule. (b-c) Paired-pulse facilitation (PPF). (c) The positive waveform used for the PPF measurement. The negative waveform used for the PPF measurement.

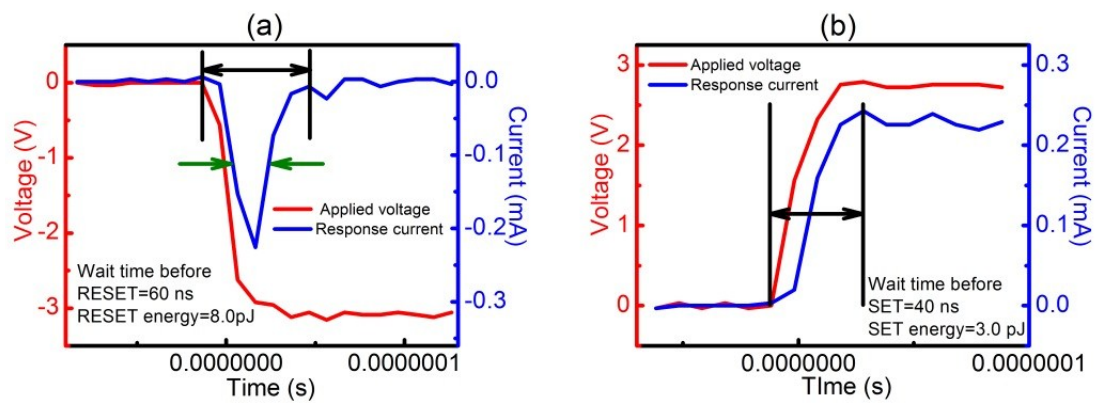

**Figure S5.** Applied voltage pulse and transient current response for a SET and RESET operation starting from the highest and lowest resistor states.
